# Supplementary material
Source: HighWire-hosted journal article supplement (https://erj.ersjournals.com/content/57/1/2002042)

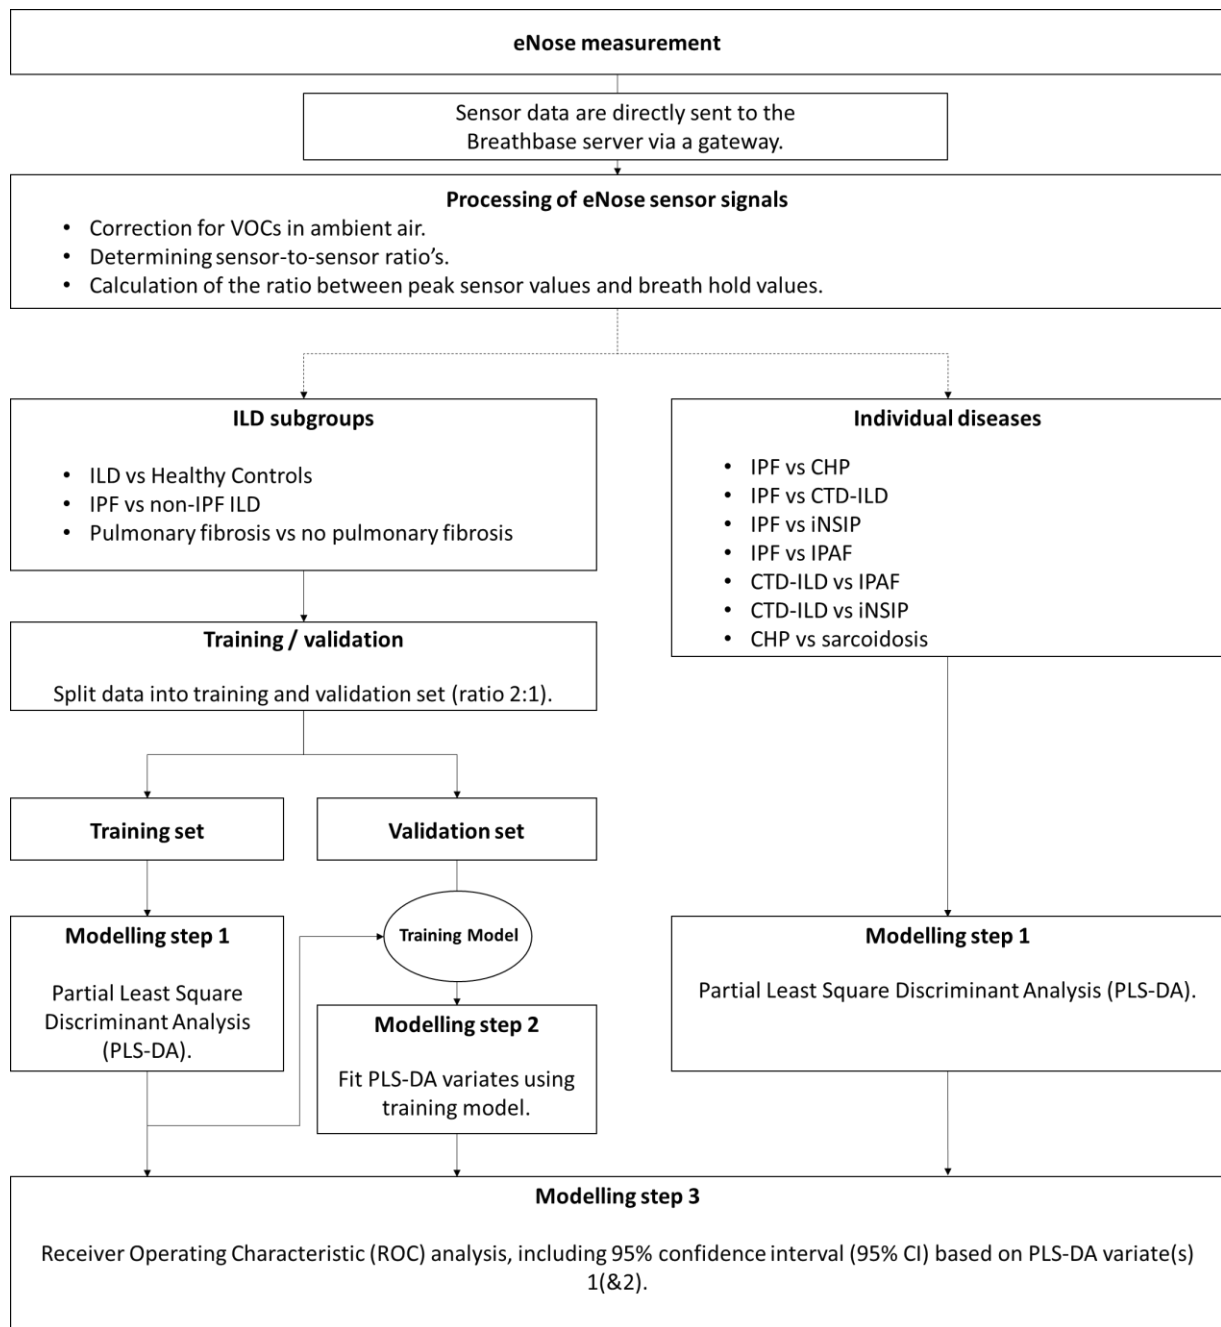

**Figure S1:** Data analysis flow chart

**Supplementary table S1.** Baseline characteristics of individual groups classified as ‘other ILDs’

|                                              | <b>Asbestosis</b> | <b>RB-ILD</b> | <b>(C)OP</b>   | <b>Drug-induced ILD</b> | <b>Unclassifiable ILD</b> | <b>GPA</b>  |
|----------------------------------------------|-------------------|---------------|----------------|-------------------------|---------------------------|-------------|
|                                              | n = 1             | n = 1         | n = 6          | n = 2                   | n = 4                     | n = 3       |
| Mean age                                     | 81                | 54            | 68 ± 9         | 67 ± 12                 | 75 ± 2                    | 46 ± 26     |
| Males (%)                                    | 1 (100)           | 1 (100)       | 4 (66.7)       | 2 (100)                 | 3 (75)                    | 3 (100)     |
| Smoking history                              |                   |               |                |                         |                           |             |
| never                                        | 1 (100)           | 0 (0.0%)      | 1 (16.7%)      | 0 (0.0%)                | 1 (25.0%)                 | 0 (0.0%)    |
| stopped                                      | 0 (0.0%)          | 0 (0.0%)      | 5 (83.3%)      | 2 (100%)                | 3 (75.0%)                 | 2 (66.7%)   |
| current                                      | 0 (0.0%)          | 1 (100%)      | 0 (0.0%)       | 0 (0.0%)                | 0 (0.0%)                  | 1 (33.3%)   |
| Median pack years (IQR)                      | 0.0               | 25.0          | 6.3 (2.3-17.2) | 41.7                    | 10.0 (1.0-20.5)           | NA          |
| Mean FVC (L)                                 | 3.16              | 4.80          | 3.67 ± 0.97    | 3.45 ± 1.01             | 2.21 ± 0.51               | 4.56 ± 1.20 |
| Mean FVC (% predicted)                       | 92                | 103           | 93 ± 25        | 71 ± 25                 | 71 ± 11                   | 87 ± 6      |
| Mean DLCO (% predicted)                      | 30                | 41            | 75 ± 19        | 46 ± 21                 | 43 ± 19                   | 76 ± 4      |
| Pathology (%)                                | 0 (0.0)           | 0 (0.0)       | 3 (50.0)       | 0 (0.0)                 | 0 (0.0)                   | 0 (0.0)     |
| Food intake < 2 hours before measurement (%) | 1 (100)           | 1 (100)       | 4 (66.7)       | 2 (100)                 | 3 (75.0)                  | 2 (66.7)    |

± standard deviation, RB-ILD: respiratory bronchiolitis-interstitial lung disease, (C)OP: (cryptogenic) organizing pneumonia, drug-induced ILD: drug-induced interstitial lung disease, unclassifiable ILD: unclassifiable interstitial lung disease, GPA: granulomatosis with polyangiitis, IQR: interquartile range, FVC: forced vital capacity, DLCO: diffusion capacity of the lungs for carbon monoxide

**Supplementary table S2. Use of ILD-related medication**

|                                      | Medication<br>use (%) | Antifibrotic<br>medication<br>(%) | Corticosteroids<br>(%) | Mycophenolate<br>(%) | TNF-<br>alpha<br>inhibitors<br>(%) | Azathioprine<br>(%) | Methotrexate<br>(%) | Hydroxychloroquine<br>(%) |
|--------------------------------------|-----------------------|-----------------------------------|------------------------|----------------------|------------------------------------|---------------------|---------------------|---------------------------|
| <b>Sarcoidosis</b><br>n=141          | 73 (51.8)             | 0 (0.0)                           | 38 (27.0)              | 0 (0.0)              | 14 (9.9)                           | 4 (2.8)             | 42 (29.8)           | 5 (3.5)                   |
| <b>IPF</b><br>n=85                   | 59 (69.4)             | 59 (69.4)                         | 0 (0.0)                | 0 (0.0)              | 0 (0.0)                            | 0 (0.0)             | 0 (0.0)             | 0 (0.0)                   |
| <b>CTD-ILD</b><br>n=33               | 29 (87.9)             | 0 (0.0)                           | 12 (36.4)              | 13 (39.4)            | 9 (27.3)                           | 3 (9.1)             | 0 (0.0)             | 0 (0.0)                   |
| <b>CHP</b><br>n=25                   | 20 (80.0)             | 1 (4.0)                           | 16 (64.0)              | 8 (32.0)             | 1 (4.0)                            | 3 (12.0)            | 0 (0.0)             | 0 (0.0)                   |
| <b>IPAF</b><br>n=11                  | 8 (72.7)              | 0 (0.0)                           | 5 (45.5)               | 3 (27.3)             | 1 (9.1)                            | 1 (9.1)             | 1 (9.1)             | 0 (0.0)                   |
| <b>iNSIP</b><br>n=10                 | 4 (40.0)              | 0 (0.0)                           | 3 (30.0)               | 1 (10.0)             | 0 (0.0)                            | 2 (20.0)            | 0 (0.0)             | 0 (0.0)                   |
| <b>Asbestosis</b><br>n=1             | 0 (0.0)               | 0 (0.0)                           | 0 (0.0)                | 0 (0.0)              | 0 (0.0)                            | 0 (0.0)             | 0 (0.0)             | 0 (0.0)                   |
| <b>RB-ILD</b><br>n=1                 | 0 (0.0)               | 0 (0.0)                           | 0 (0.0)                | 0 (0.0)              | 0 (0.0)                            | 0 (0.0)             | 0 (0.0)             | 0 (0.0)                   |
| <b>(C)OP</b><br>n=6                  | 1 (16.7)              | 0 (0.0)                           | 0 (0.0)                | 0 (0.0)              | 0 (0.0)                            | 1 (16.7)            | 0 (0.0)             | 0 (0.0)                   |
| <b>Drug-induced<br/>ILD</b><br>n=2   | 0 (0.0)               | 0 (0.0)                           | 0 (0.0)                | 0 (0.0)              | 0 (0.0)                            | 0 (0.0)             | 0 (0.0)             | 0 (0.0)                   |
| <b>Unclassifiable<br/>ILD</b><br>n=4 | 1 (25.0)              | 0 (0.0)                           | 1 (25.0)               | 0 (0.0)              | 0 (0.0)                            | 0 (0.0)             | 0 (0.0)             | 0 (0.0)                   |
| <b>GPA</b><br>n=3                    | 3 (100)               | 0 (0.0)                           | 3 (100)                | 1 (33.3)             | 1 (33.3)                           | 0 (0.0)             | 0 (0.0)             | 0 (0.0)                   |

IPF = idiopathic pulmonary fibrosis, CTD-ILD = connective tissue disease-associated interstitial lung disease, CHP = chronic hypersensitivity pneumonitis, IPAF = interstitial pneumonia with autoimmune features, iNSIP = idiopathic non-specific interstitial pneumonia, RB-ILD: respiratory bronchiolitis-interstitial lung disease, (C)OP: (cryptogenic) organizing pneumonia, drug-induced ILD: drug-induced interstitial lung disease, unclassifiable ILD: unclassifiable interstitial lung disease, GPA: granulomatosis with polyangiitis

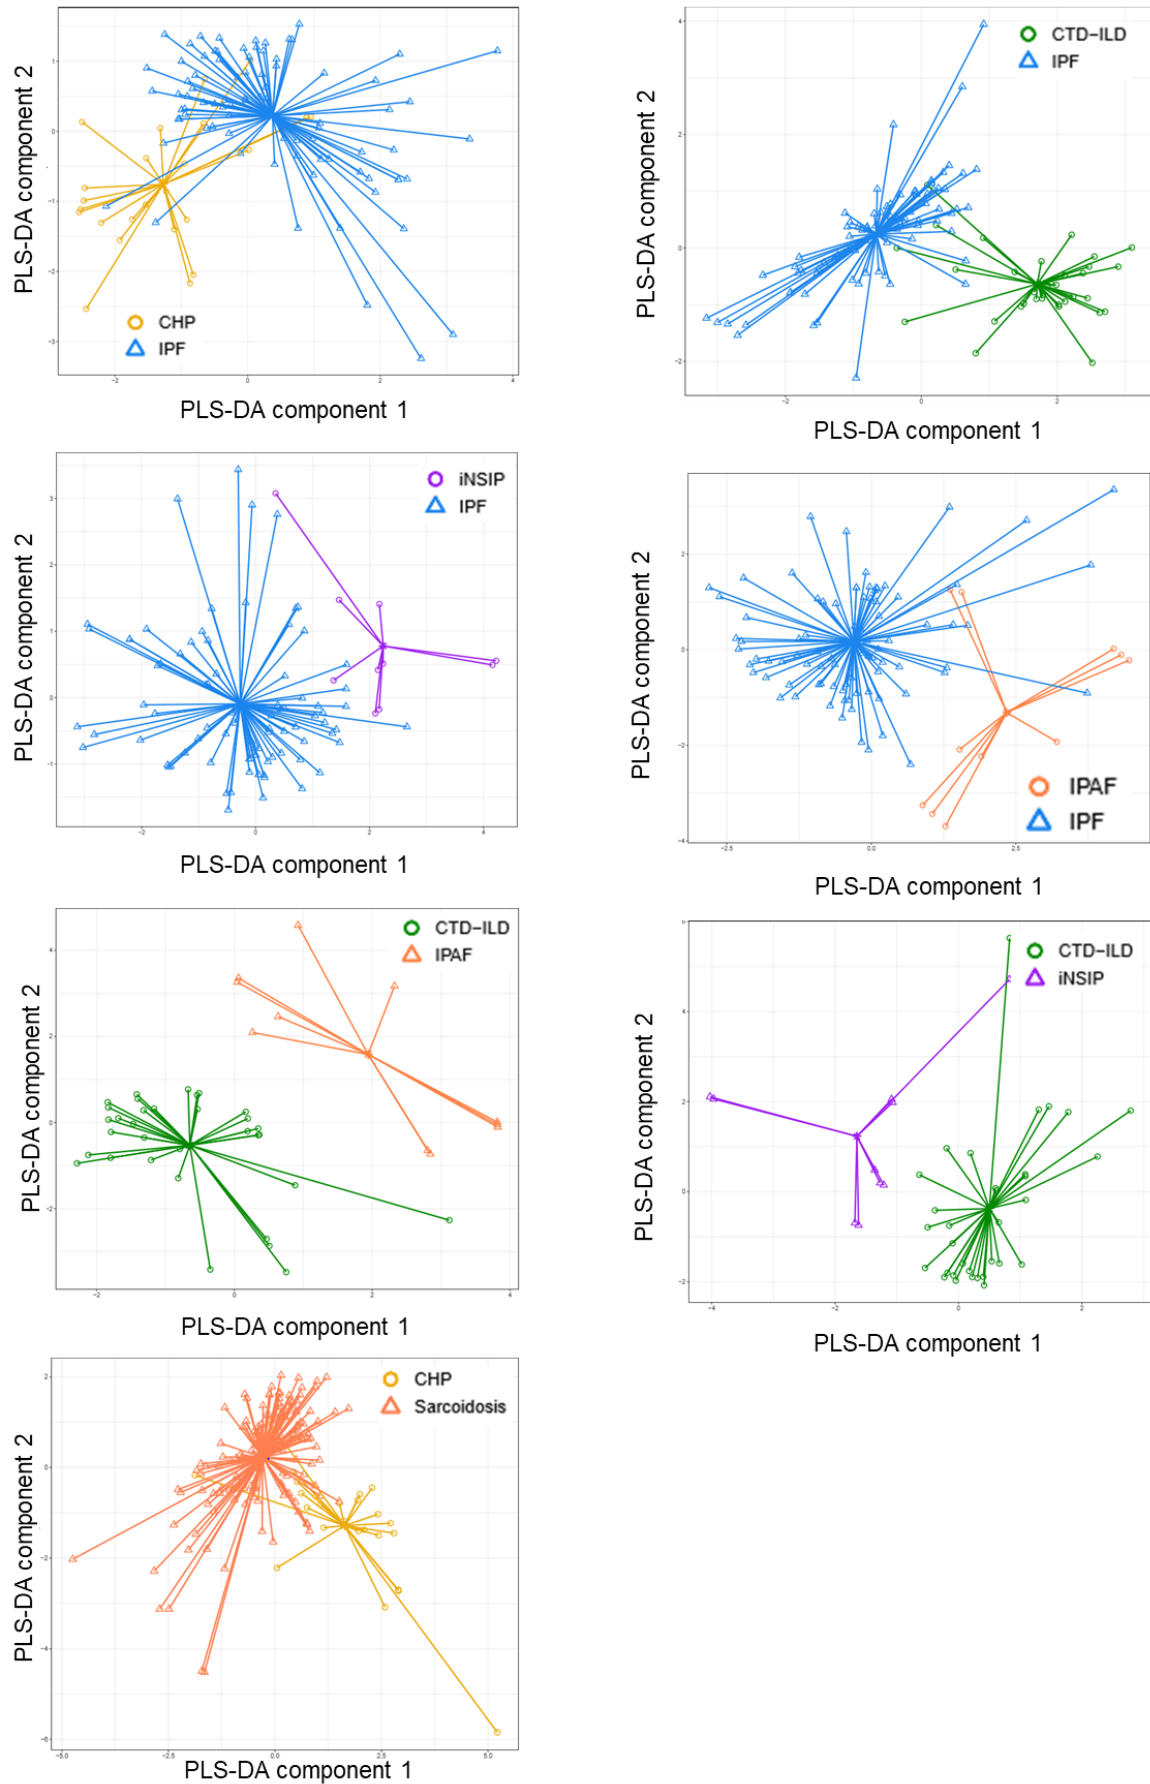

**Figure S2:** Results of the PLS-DA analysis for comparison of individual diseases

### Additional analyses ILD vs healthy controls

ILD (n=322) vs healthy controls (n=20) with a mean age of 50, all older than 40 years:

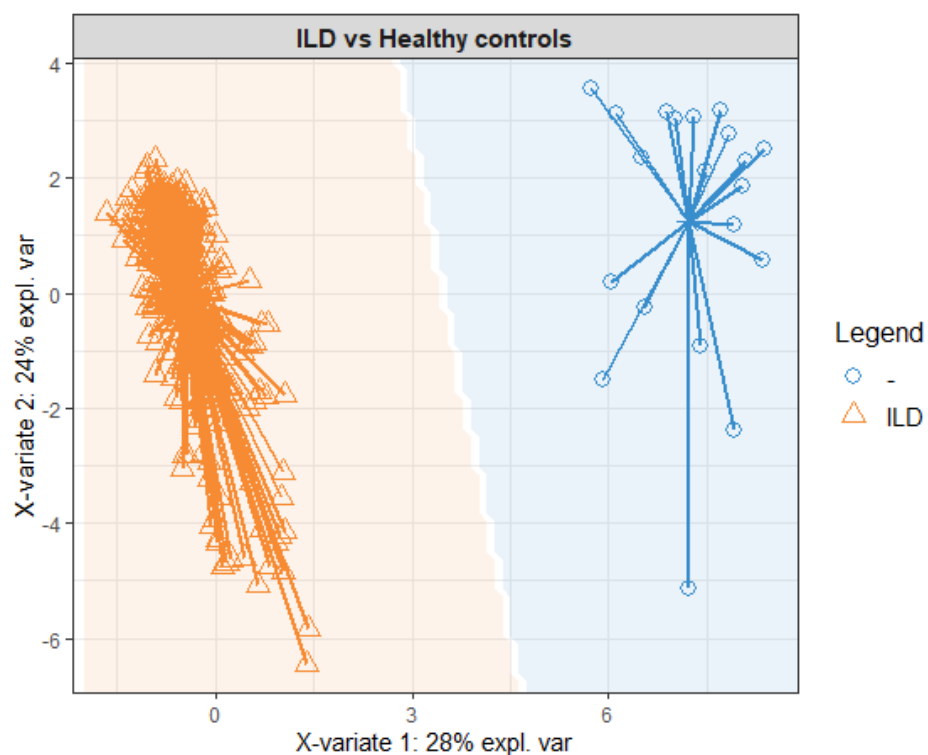

ILD (n=322) vs male healthy controls (n=15):

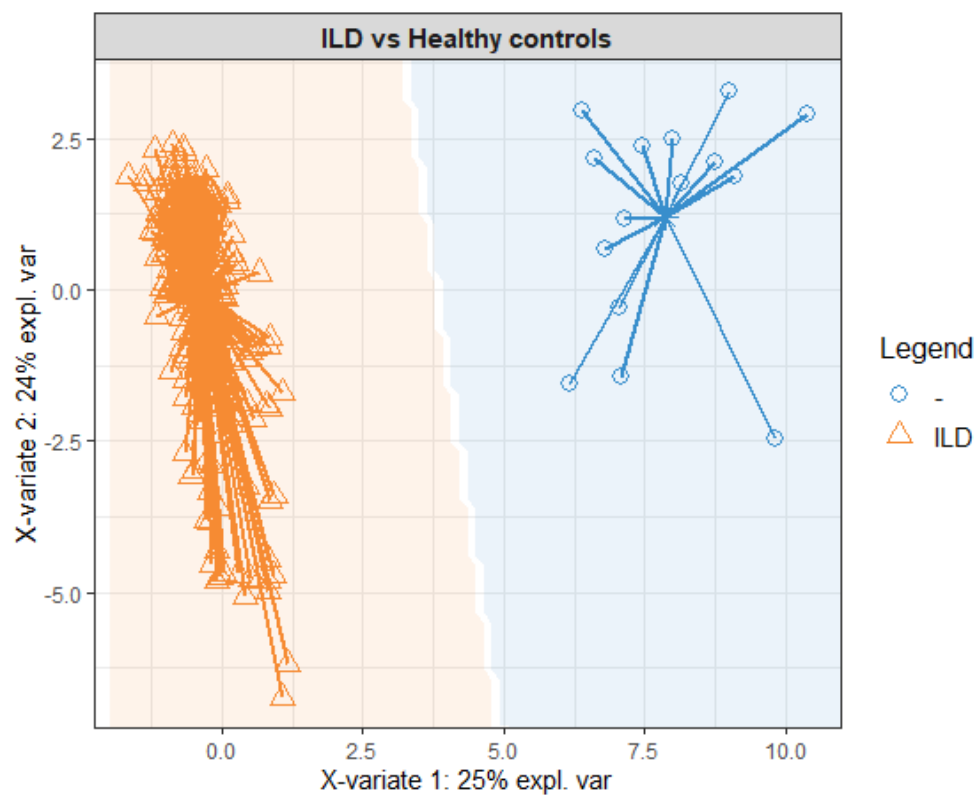

ILD (n=305) vs healthy controls (n=44), without smokers:

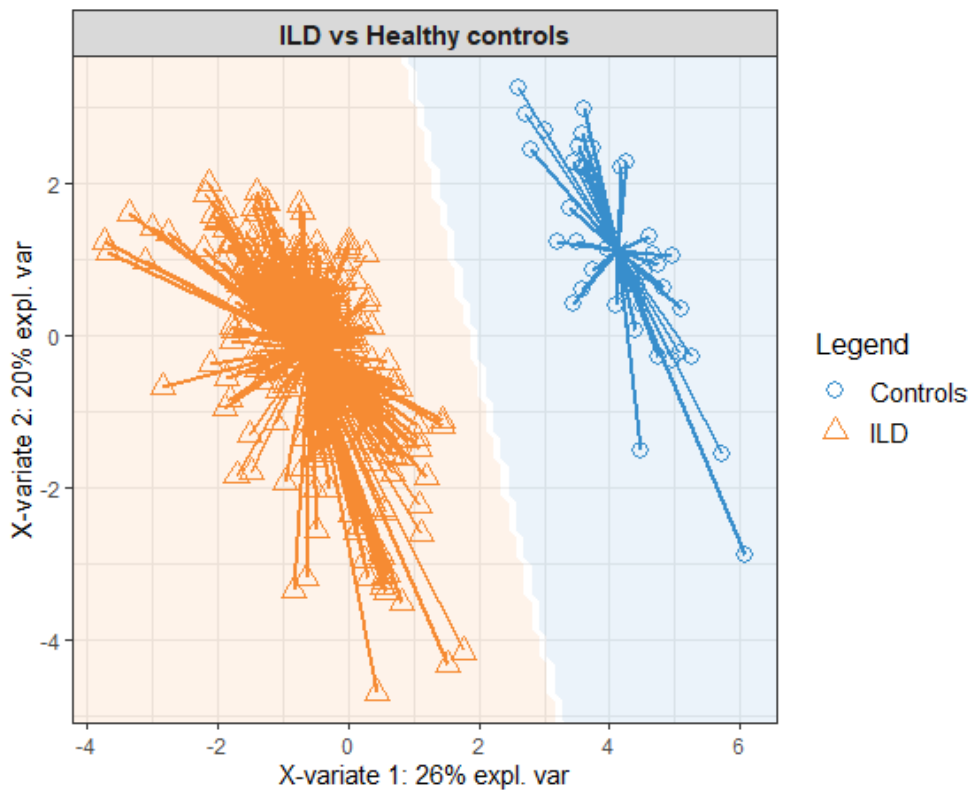

### Additional analyses entire cohort

Food intake <2 hours before eNose measurement:

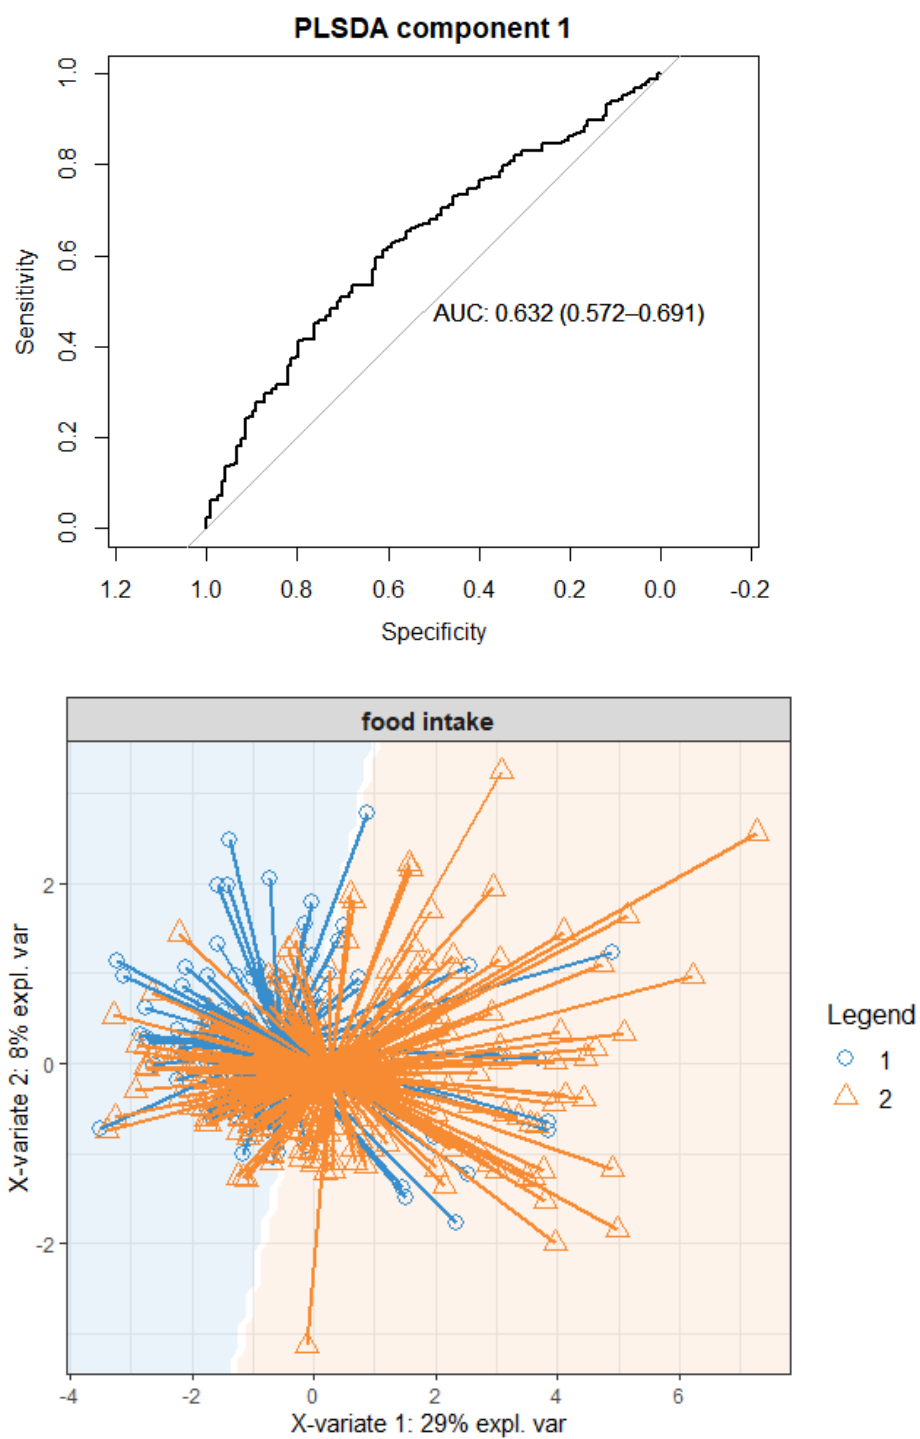



Difference between morning and afternoon measurements:

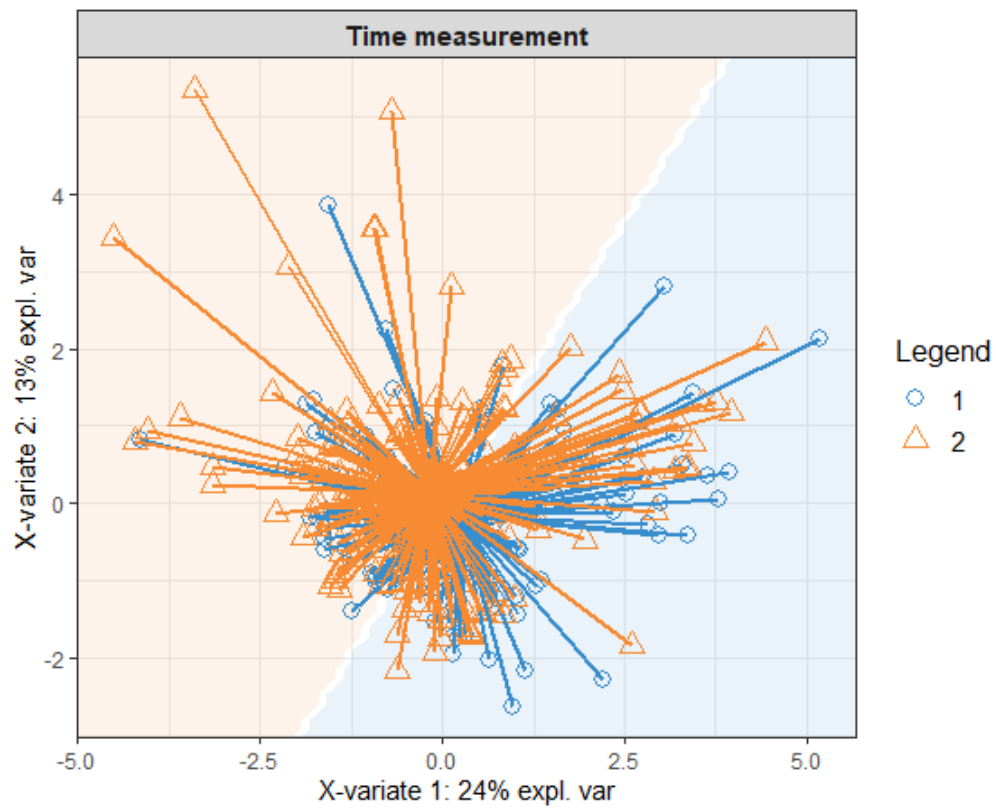

1 = morning (between 8 and 12 a.m.)

2 = afternoon (between 12 and 17 p.m.)

40% of measurements were in the morning (n=148), 60% in the afternoon (n=219)

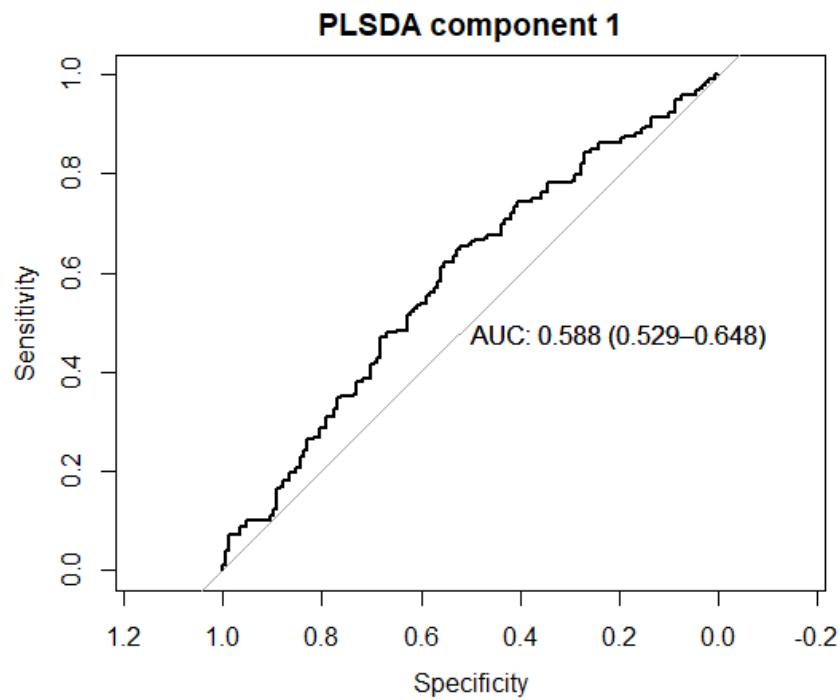

### Smoking status

Never smoker: 167, ex-smoker: 182, current smoker: 21

AUC current vs ever smoker = 0.64

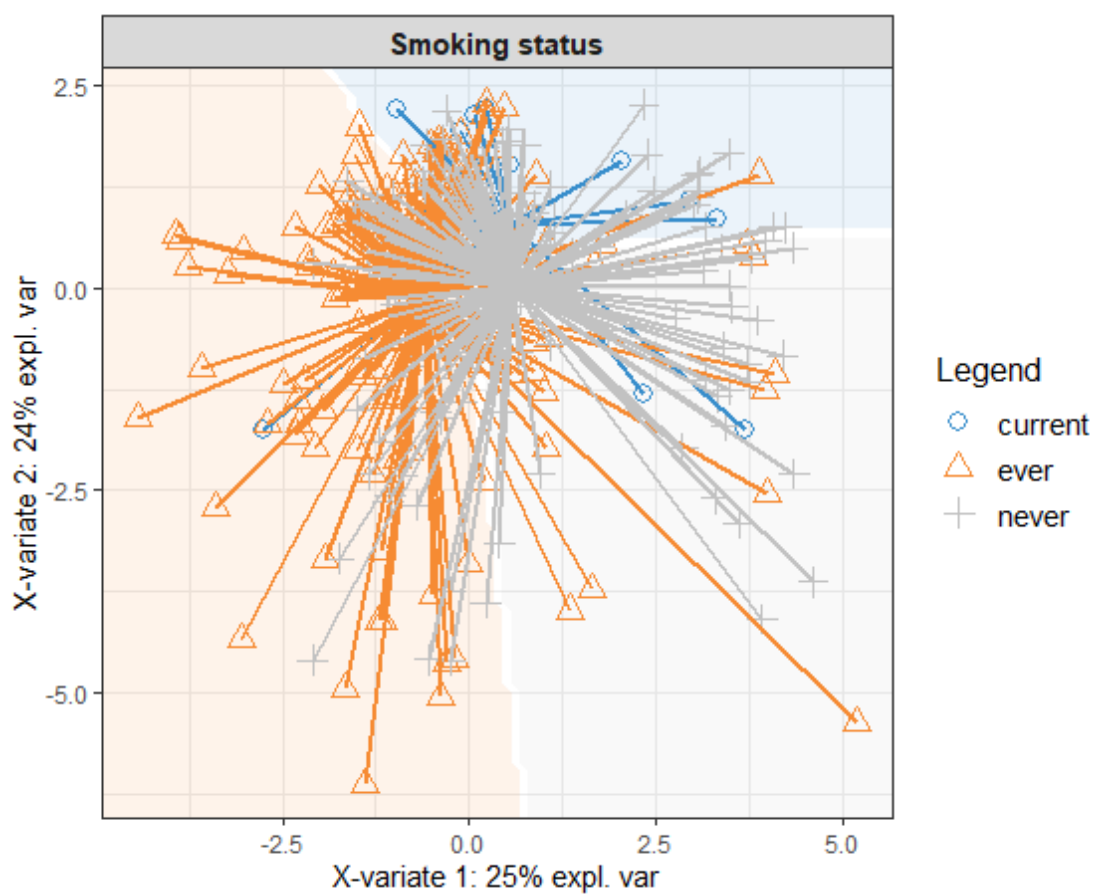

## Sarcoidosis patients

Use of medication vs no medication:

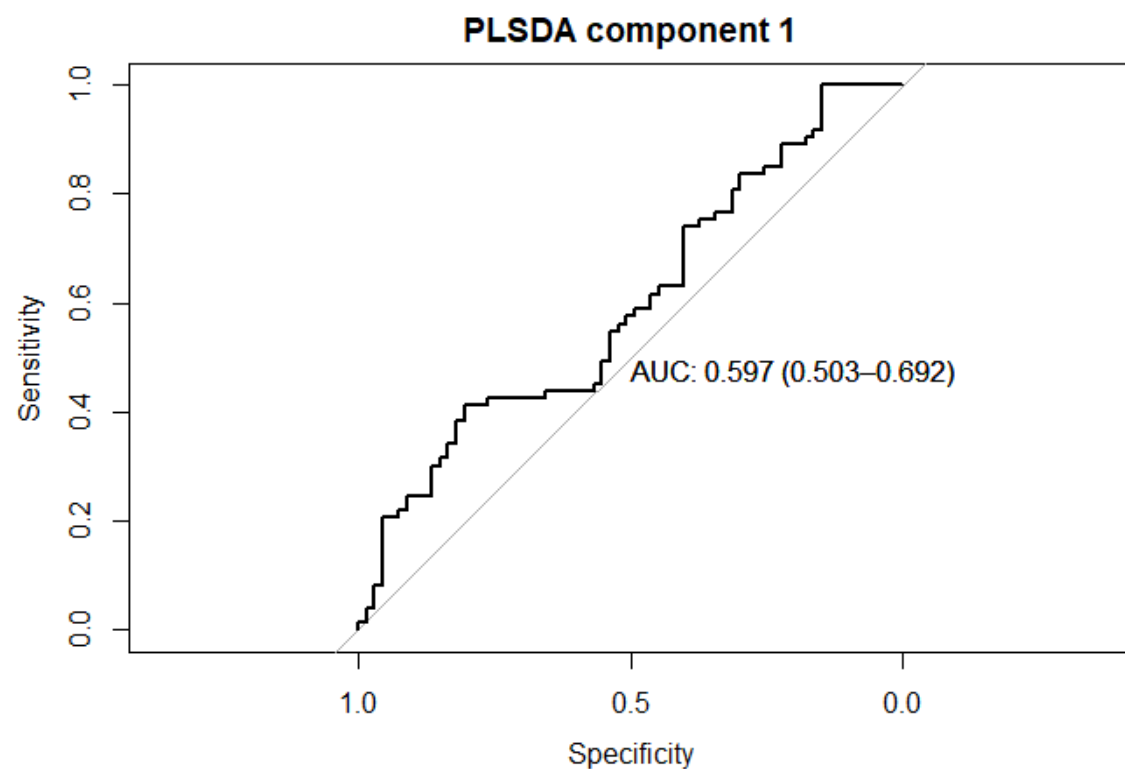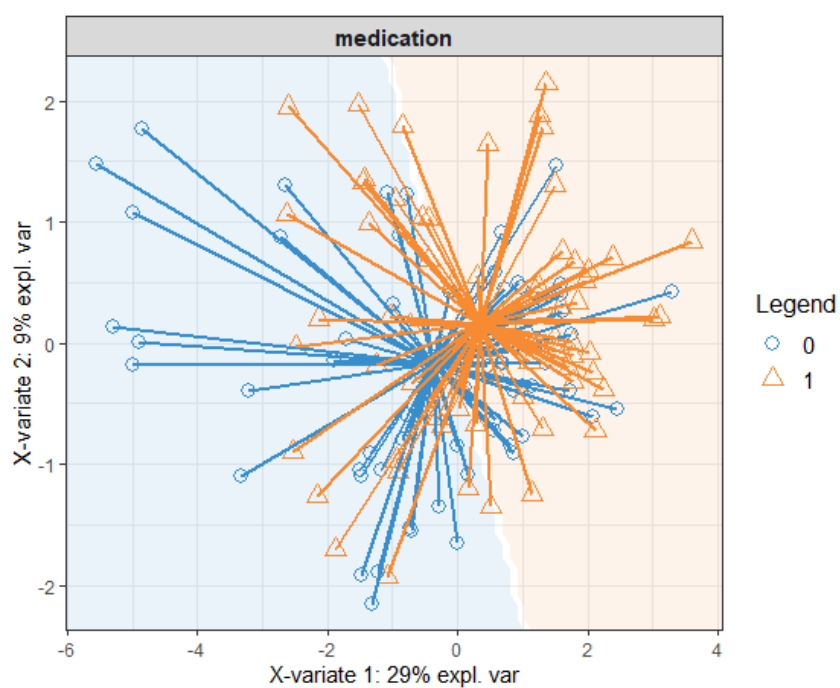

Gender:

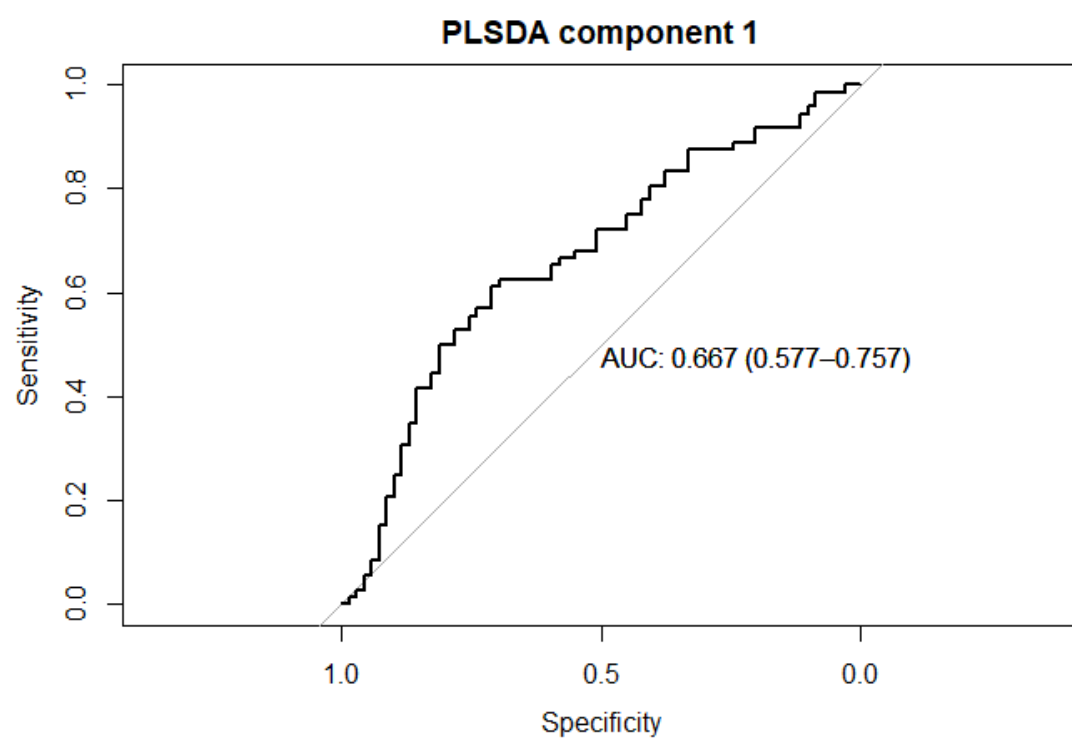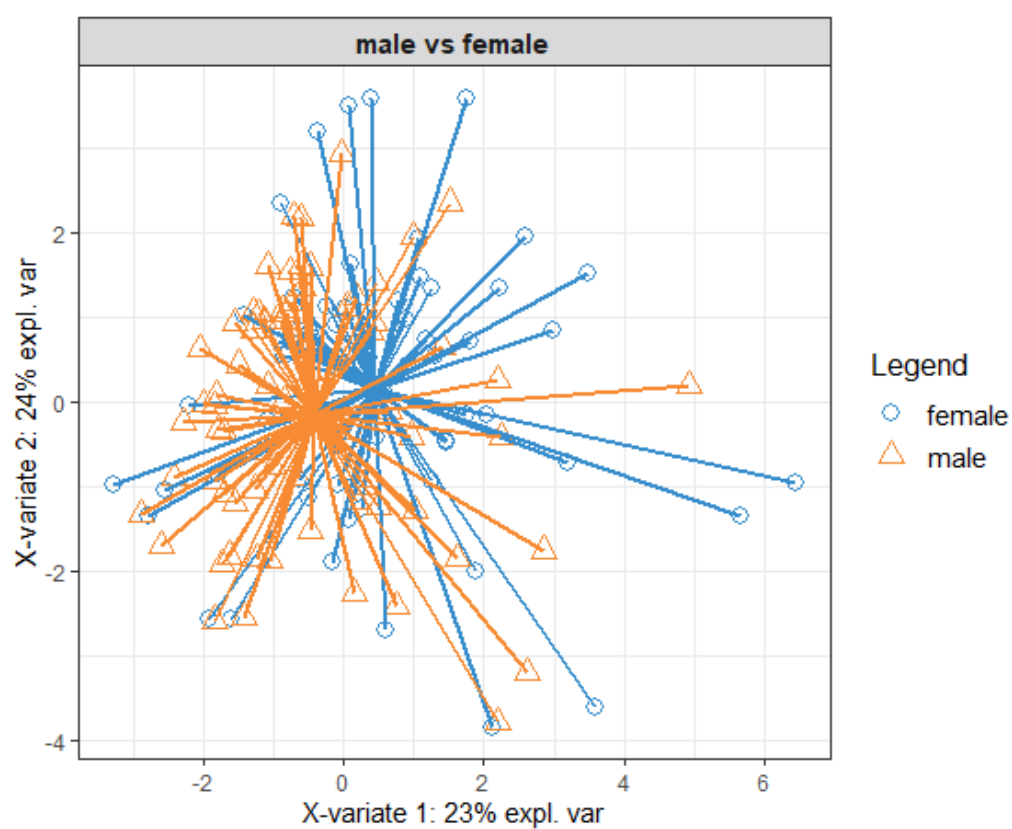

Age: cut-off on the median age (=53) in sarcoidosis patients

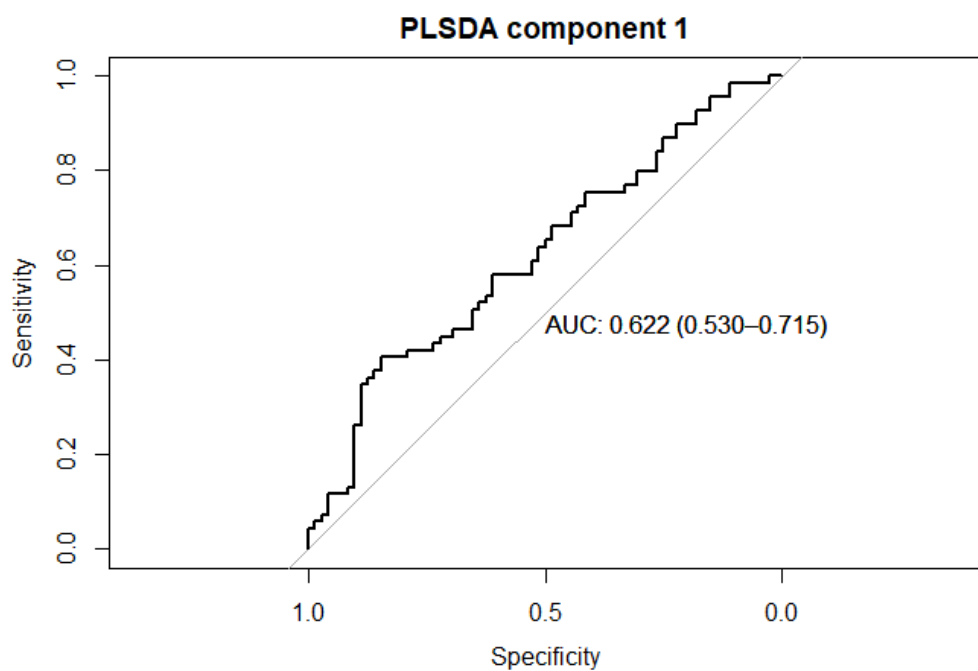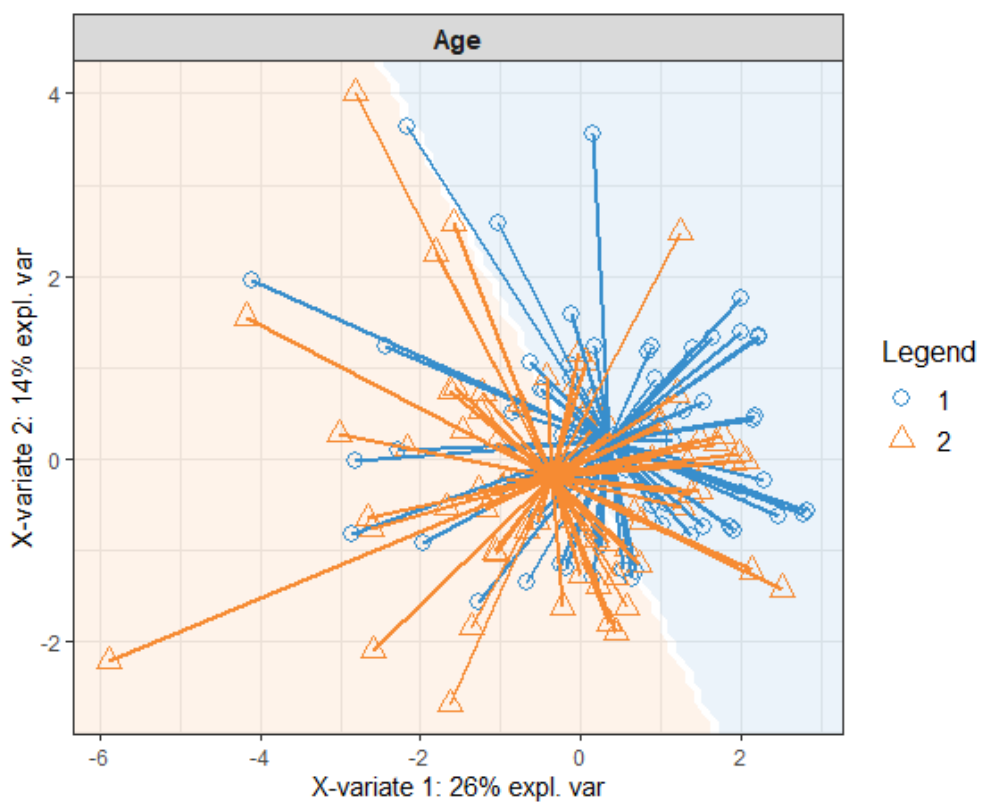

## Healthy controls

Gender:

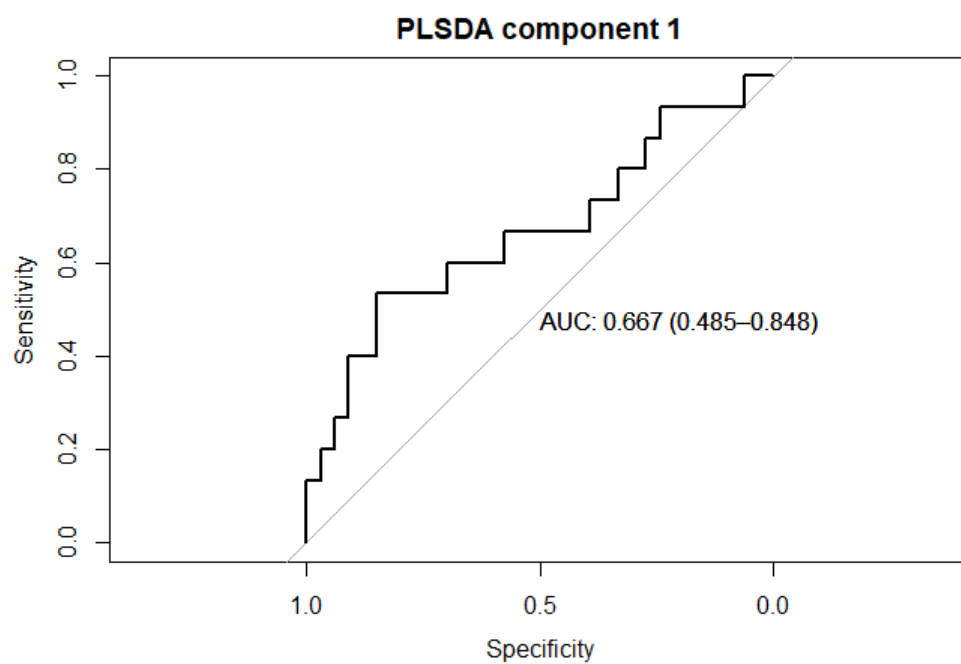

Age:

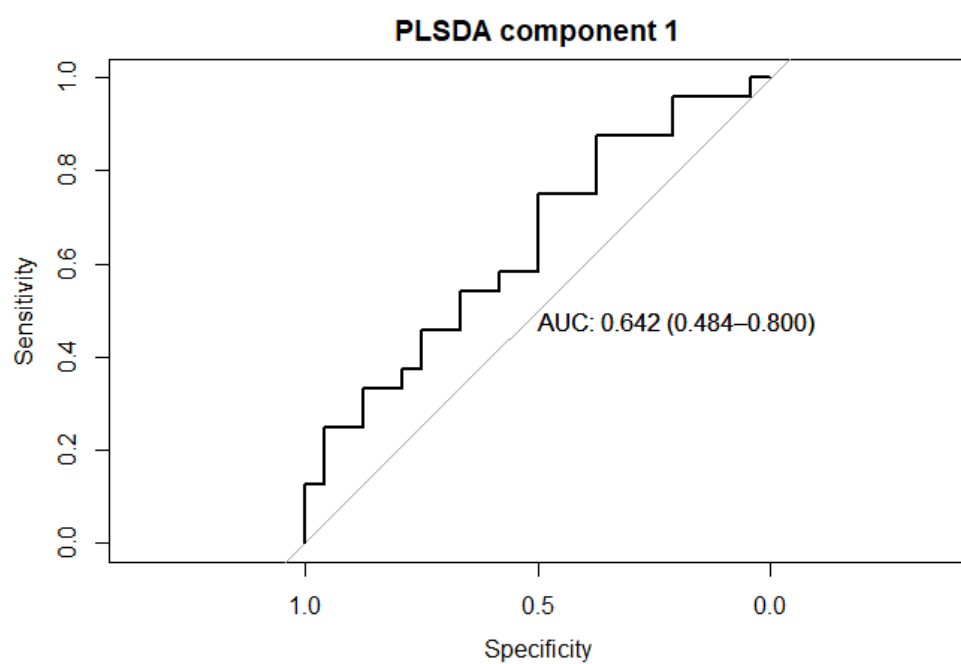

Supplement: inline-supplementary-material-1 [file inline-supplementary-material-1.pdf]
